# Supplementary material for: Defect engineering in atomically-thin bismuth oxychloride towards photocatalytic oxygen evolution
Source: Royal Society of Chemistry journal article supplement (doi:10.1039/c7ta03624h), 2017-01-01
Supplement: c7ta03624h1.pdf [file c7ta03624h1.pdf]

## Supporting Information

### **Defect engineering in atomically-thin bismuth oxychloride towards photocatalytic oxygen evolution**

Jun Di<sup>1,2</sup>, Chao Chen<sup>2</sup>, Shi-Ze Yang<sup>3</sup>, Mengxia Ji<sup>1</sup>, Cheng Yan<sup>2</sup>, Kaizhi Gu<sup>4</sup>, Jiexiang Xia<sup>1,\*</sup>, Huaming Li<sup>1</sup>, Shuzhou Li<sup>2</sup>, Zheng Liu<sup>2,\*</sup>

<sup>1</sup> School of Chemistry and Chemical Engineering, Institute for Energy Research, Jiangsu University, 301 Xuefu Road, Zhenjiang, 212013, P. R. China

<sup>2</sup> Center for Programmable Materials, School of Materials Science & Engineering, Nanyang Technological University, Singapore 639798, Singapore

<sup>3</sup> Materials Science and Technology Division, Oak Ridge National Laboratory, USA

<sup>4</sup> School of Chemistry and Molecular Engineering, East China University of Science and Technology, Shanghai 200237, P. R. China

\*Corresponding author: z.liu@ntu.edu.sg; xjx@ujs.edu.cn

## The details of density functional theory (DFT) calculations

Code: GPAW

Method: projector-augmented wave (PAW)

Basis: Plane wave

Pseudopotential: PBE

Convergence criterion:

Energy: 0.0005, # eV / electron

Density: 1.0e-4,

Eigenstates: 4.0e-8, # eV<sup>2</sup> / electron

Bands: occupied,

Forces: float('inf')} # eV / Ang Max

k-points:

bulk material: 12\*12 \*12 f

(001) 2d surface 12 \*12 \*1

(110) 1d surface 1\*12 \*1

Defect rich surface 1\*12 \*1

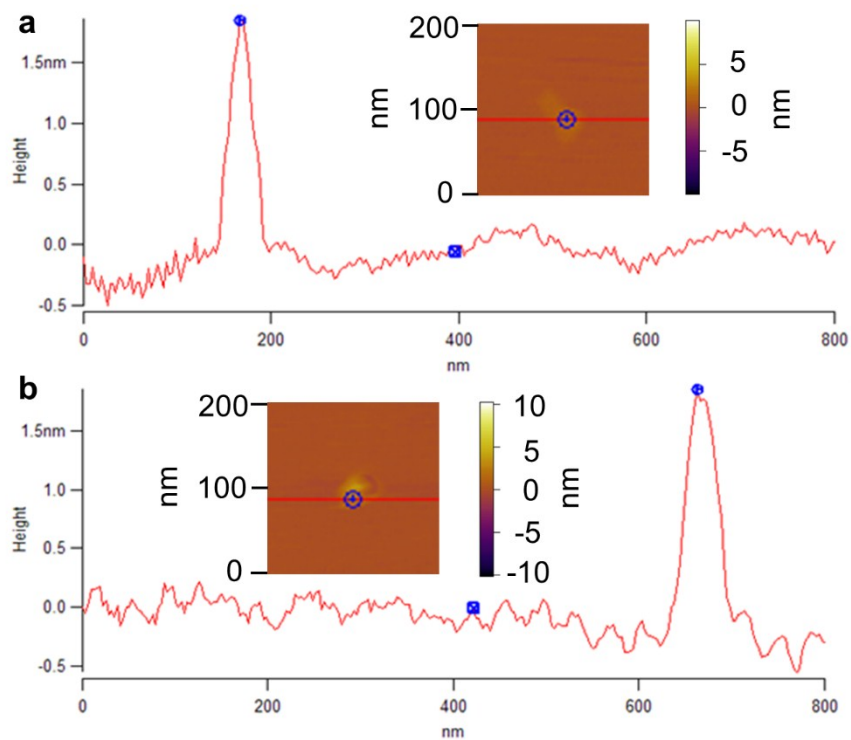

**Figure S1.** AFM images of (a) BiOCl materials and (b) defect-rich BiOCl ultrathin nanosheets.

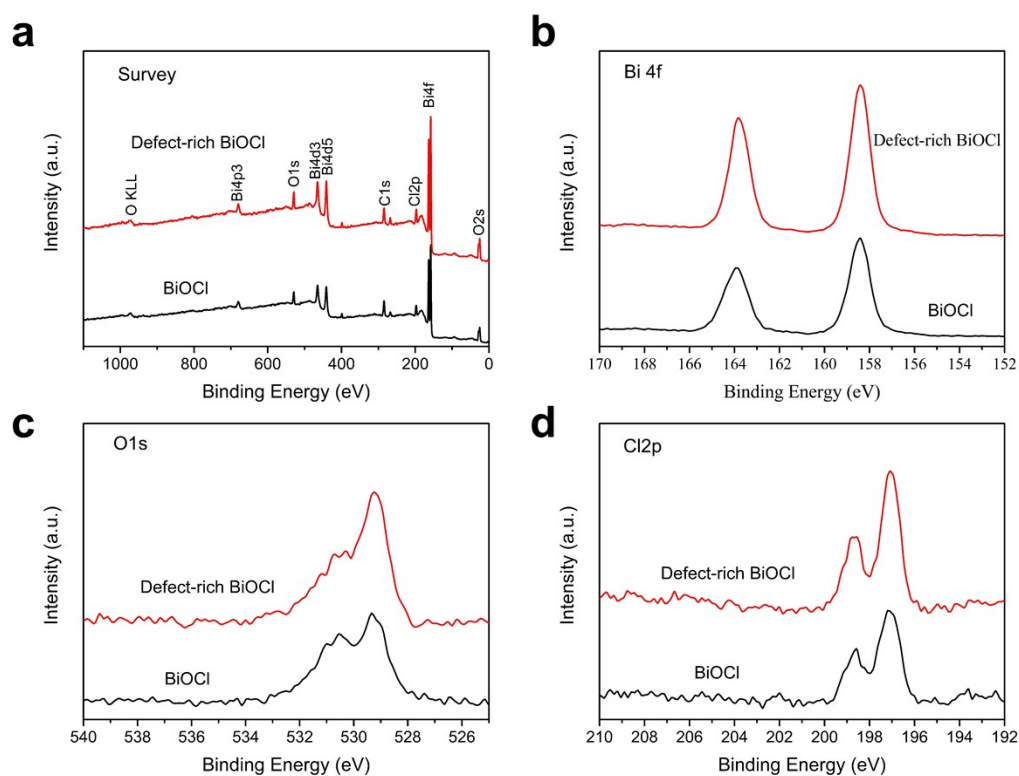

**Figure S2.** XPS spectra of BiOCl and defect-rich BiOCl materials, (a) Survey of the sample, (b) Bi 4f, (c) O 1s, (d) Cl 2p.

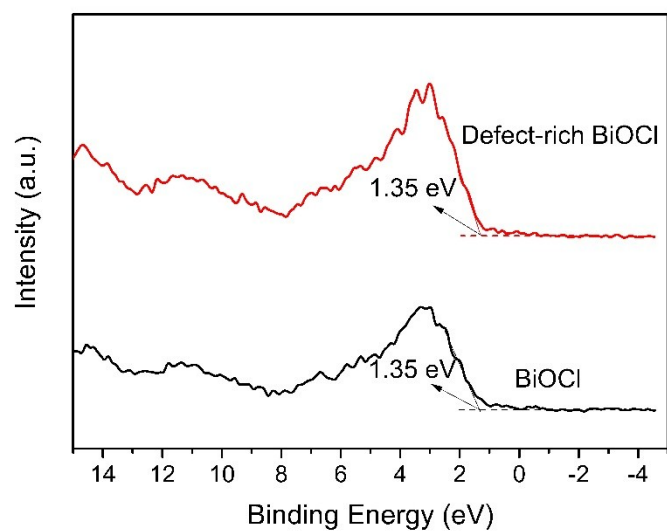

**Figure S3.** XPS valence band spectra of BiOCl and defect-rich BiOCl.

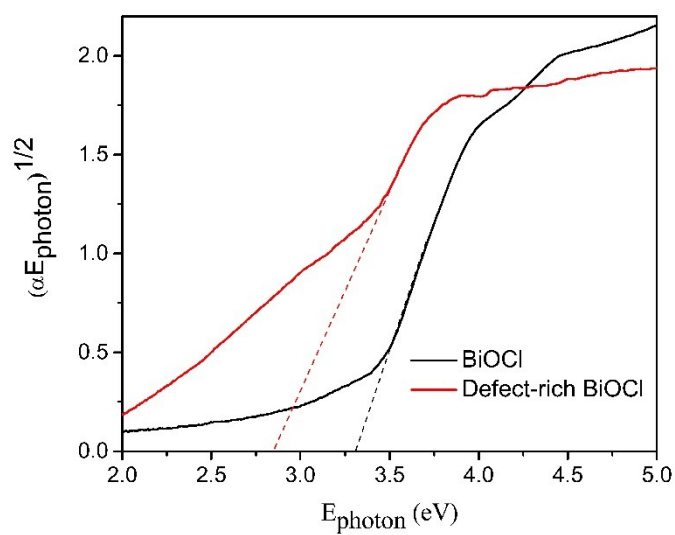

**Figure S4.**  $(\alpha E_{\text{photon}})^{1/2}$  vs.  $E_{\text{photon}}$  curves of the as-prepared BiOCl and defect-rich BiOCl sample.

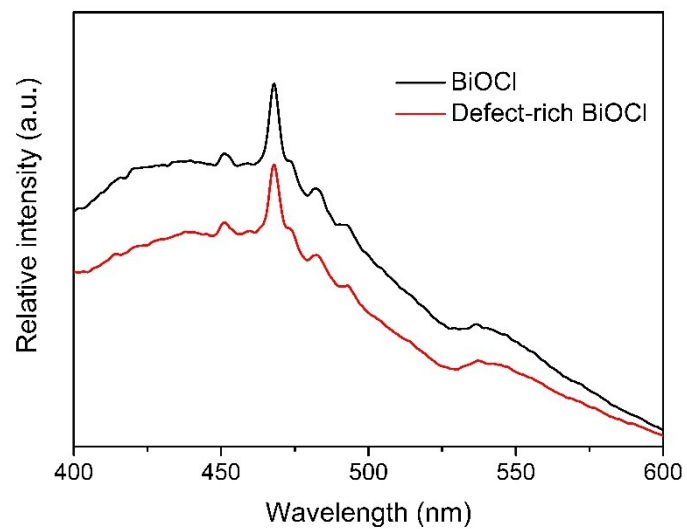

**Figure S5.** Steady-state photoluminescence (PL) spectra of the BiOCl and defect-rich BiOCl materials.

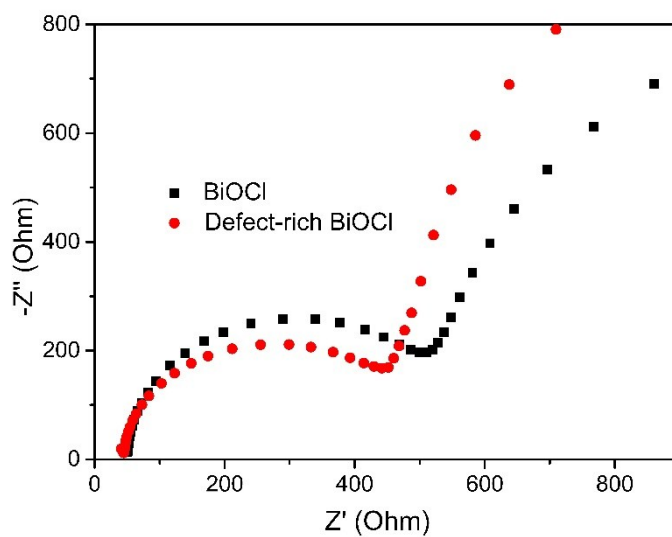

**Figure S6.** Electrochemical impedance spectroscopy (EIS) of BiOCl and defect-rich BiOCl materials.

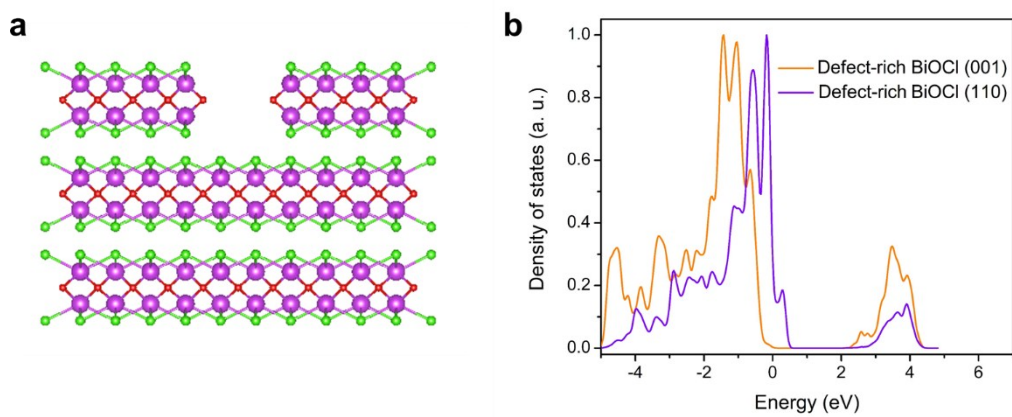

**Figure S7.** (a) Crystal structure of defects-rich BiOCl, (b) DOS diagrams from first-principles simulations for defects-rich BiOCl (001) and defects-rich (110) facets.

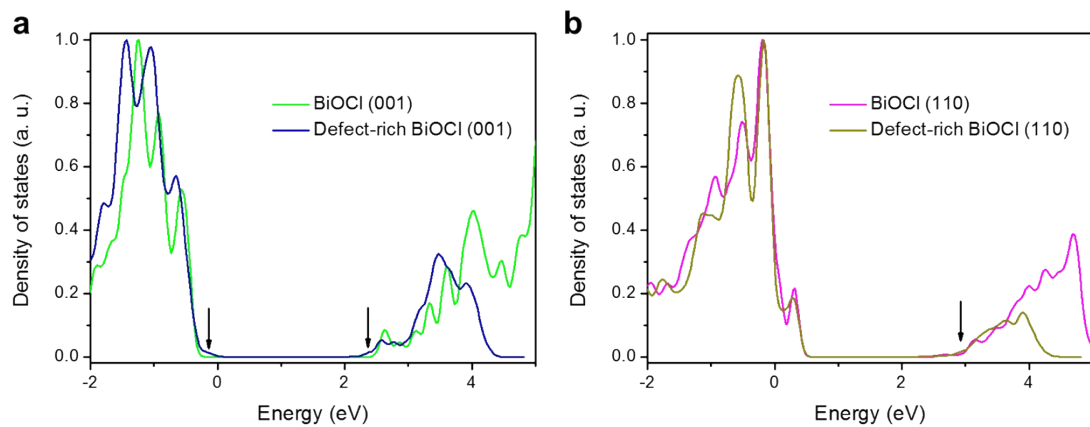

**Figure S8.** Calculated DOS of atomically-thin BiOCl nanosheets and defect-rich BiOCl, (a) (001) and (b) (110) facets.

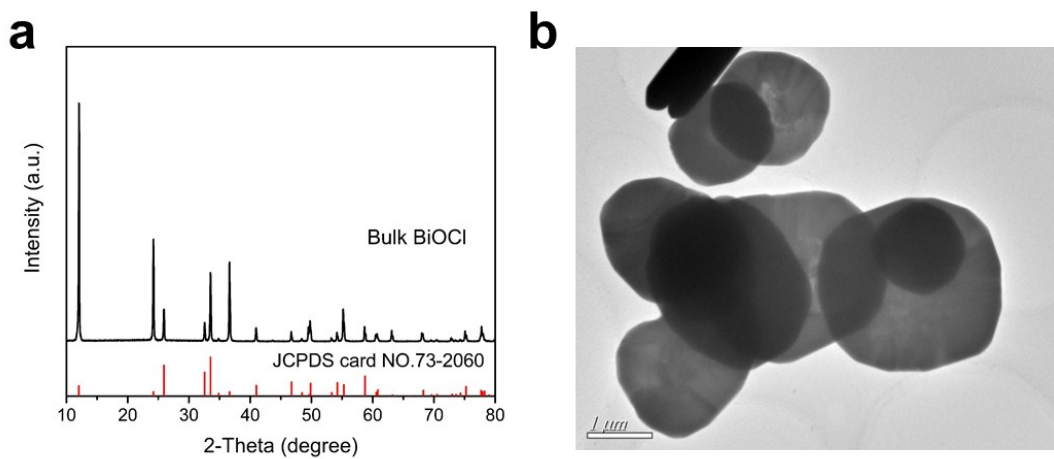

**Figure S9.** Characterizations of bulk BiOCl. (a) XRD pattern and (b) TEM image.

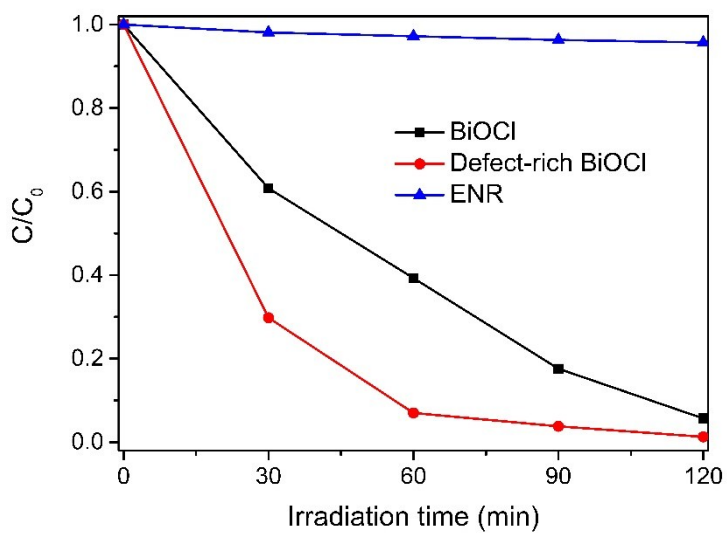

**Figure S10.** Photocatalytic degradation of ENR in the presence of BiOCl and defect-rich BiOCl materials under light irradiation.

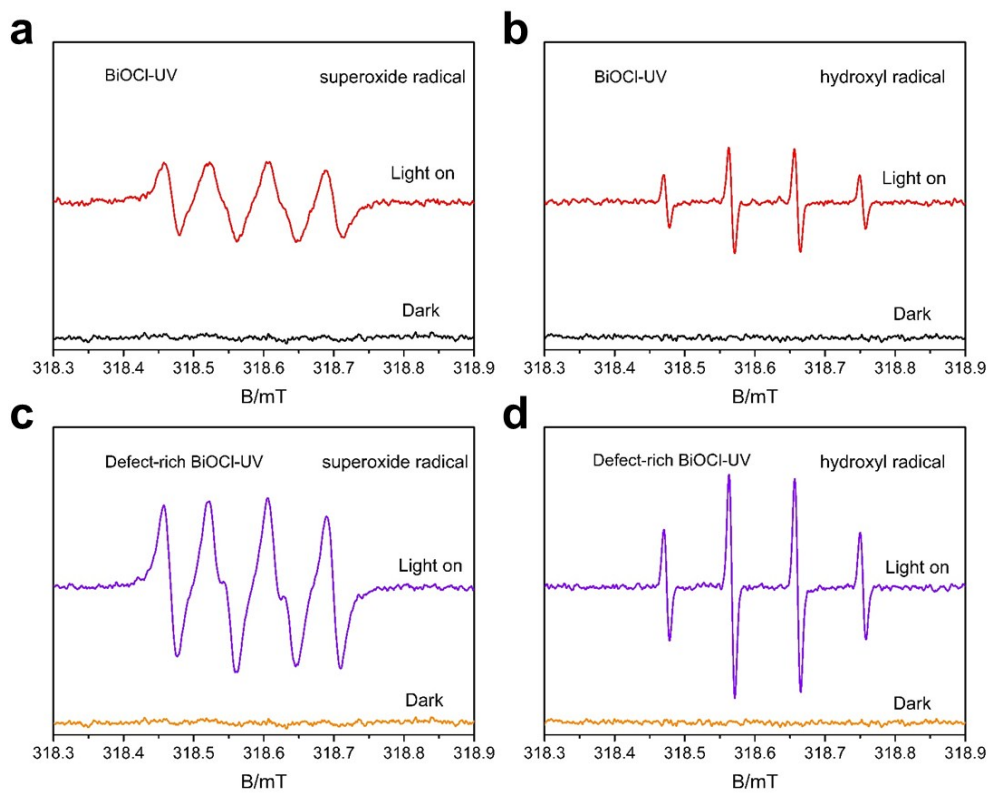

**Figure S11.** ESR spectra of the DMPO- $O_2^{\bullet-}$  adducts and DMPO- $\cdot OH$  recorded with (a, b) BiOCl and (c, d) defect-rich BiOCl under UV light irradiation.
